# Supplementary material for: Protective Effect and Mechanism of Shengmai Formula in Ultrafine Particle Matter-Mediated Atherosclerosis and Myocardial Ischemic Injury
Source: Research Square preprint supplement (doi:10.21203/rs.3.rs-384449/v1), 2021-04-06
Supplement: Supplementary file 1 [file 568fb329e9833af6de36328a.docx]

| Genes | Primer sequences (5'to3') | PCR product length |
| --- | --- | --- |
| β-actin | F: CCGCGAGTACAACCTTCTTG | 297 bp |
| R: CAGTTGGTGACAATGCCGTG |
| Nrf2 | F：ATATACGCAGGAGAGGGAAG | 222 bp |
| R：TCCCATCCTCATCACGTAAC |
| HO-1 | F：GGGTCCTCACACTCAGTTTC | 228 bp |
| R：CCAGGCATCTCCTTCCATTC |
| NQO1 | F：TGGAAGAAGCGTCTGGAGACTGTC | 188 bp |
| R：ATCTGGTTGTCGGCTGGAATGGA |

**Supplement Table S1. List of primer sequences used for qRT-PCR analysis in this study.**

**F: Forward primer. R: reverse primer**
